# Supplementary material
Source: publisher figshare collection journal article supplement (https://acs.figshare.com/ndownloader/files/3623202)
Supplement: Supplementary file 1 [file 3623202]

 
data_cu-1099 
 
_audit_creation_method
;
CrysAlisPro, Agilent Technologies,
Version 1.171.37.35 (release 13-08-2014 CrysAlis171 .NET)
(compiled Aug 13 2014,18:06:01)
;
_chemical_name_systematic 
; 
 ? 
; 
_chemical_name_common             ? 
_chemical_melting_point           ? 
_chemical_formula_moiety          ? 
_chemical_formula_sum 
 'C25 H26 S Si' 
_chemical_formula_weight          386.61 
_chemical_absolute_configuration  ad
 
loop_ 
 _atom_type_symbol 
 _atom_type_description 
 _atom_type_scat_dispersion_real 
 _atom_type_scat_dispersion_imag 
 _atom_type_scat_source 
 'C'  'C'   0.0181   0.0091 
 'International Tables Vol C Tables 4.2.6.8 and 6.1.1.4' 
 'H'  'H'   0.0000   0.0000 
 'International Tables Vol C Tables 4.2.6.8 and 6.1.1.4' 
 'Si'  'Si'   0.2541   0.3302 
 'International Tables Vol C Tables 4.2.6.8 and 6.1.1.4' 
 'S'  'S'   0.3331   0.5567 
 'International Tables Vol C Tables 4.2.6.8 and 6.1.1.4' 
 
_symmetry_cell_setting            monoclinic 
_symmetry_space_group_name_H-M    P21 
 
loop_ 
 _symmetry_equiv_pos_as_xyz 
 'x, y, z' 
 '-x, y+1/2, -z' 
 
_cell_length_a                    12.55173(18) 
_cell_length_b                    7.82999(12) 
_cell_length_c                    21.7095(3) 
_cell_angle_alpha                 90.00 
_cell_angle_beta                  101.1081(13) 
_cell_angle_gamma                 90.00 
_cell_volume                      2093.63(5) 
_cell_formula_units_Z             4 
_cell_measurement_temperature     150(2) 
_cell_measurement_reflns_used     5672
_cell_measurement_theta_min       3.5700
_cell_measurement_theta_max       73.6110
 
_exptl_crystal_description        block 
_exptl_crystal_colour             colourless 
_exptl_crystal_size_max           0.44 
_exptl_crystal_size_mid           0.22 
_exptl_crystal_size_min           0.11 
_exptl_crystal_density_meas       ? 
_exptl_crystal_density_diffrn     1.227 
_exptl_crystal_density_method     'not measured' 
_exptl_crystal_F_000              824 
_exptl_absorpt_coefficient_mu     1.950 
_exptl_absorpt_correction_type    'multi-scan'
_exptl_absorpt_correction_T_min   0.4808 
_exptl_absorpt_correction_T_max   0.8141 
_exptl_absorpt_process_details
;
CrysAlisPro, Agilent Technologies,
Version 1.171.37.35 (release 13-08-2014 CrysAlis171 .NET)
(compiled Aug 13 2014,18:06:01)
Empirical absorption correction using spherical harmonics,
 implemented in SCALE3 ABSPACK scaling algorithm.
;
 
_exptl_special_details 
; 
 ? 
; 
 
_diffrn_ambient_temperature       150.00(10) 
_diffrn_ambient_environment       'N~2~'
_diffrn_source                    'sealed X-ray tube'
_diffrn_source_type               'SuperNova (Cu) X-ray Source'
_diffrn_radiation_probe           'x-ray'
_diffrn_radiation_type            'Cu K\a'
_diffrn_radiation_wavelength       1.54184
_diffrn_radiation_monochromator   'mirror'
_diffrn_measurement_device        'four-circle diffractometer'
_diffrn_measurement_device_type   'SuperNova, Single source at offset, Atlas'
_diffrn_detector                  'CCD plate'
_diffrn_detector_type             'Atlas'
_diffrn_measurement_method        '\w scans'
_diffrn_detector_area_resol_mean  10.5435
_diffrn_standards_number          ? 
_diffrn_standards_interval_count  ? 
_diffrn_standards_interval_time   ? 
_diffrn_standards_decay_%         ? 
_diffrn_reflns_number             8063 
_diffrn_reflns_av_R_equivalents   0.0205 
_diffrn_reflns_av_sigmaI/netI     0.0307 
_diffrn_reflns_limit_h_min        -15 
_diffrn_reflns_limit_h_max        10 
_diffrn_reflns_limit_k_min        -9 
_diffrn_reflns_limit_k_max        8 
_diffrn_reflns_limit_l_min        -26 
_diffrn_reflns_limit_l_max        23 
_diffrn_reflns_theta_min          3.59 
_diffrn_reflns_theta_max          67.49 
_reflns_number_total              5157 
_reflns_number_gt                 4980 
_reflns_threshold_expression      >2sigma(I) 
 
_computing_data_collection
;
CrysAlisPro, Agilent Technologies,
Version 1.171.37.35 (release 13-08-2014 CrysAlis171 .NET)
(compiled Aug 13 2014,18:06:01)
;
_computing_cell_refinement
;
CrysAlisPro, Agilent Technologies,
Version 1.171.37.35 (release 13-08-2014 CrysAlis171 .NET)
(compiled Aug 13 2014,18:06:01)
;
_computing_data_reduction
;
CrysAlisPro, Agilent Technologies,
Version 1.171.37.35 (release 13-08-2014 CrysAlis171 .NET)
(compiled Aug 13 2014,18:06:01)
;
_computing_structure_solution     'SHELXS-97 (Sheldrick, 1990)' 
_computing_structure_refinement   'SHELXL-97 (Sheldrick, 1997)' 
_computing_molecular_graphics     ? 
_computing_publication_material   ? 
 
_refine_special_details 
; 
 Refinement of F^2^ against ALL reflections.  The weighted R-factor wR and 
 goodness of fit S are based on F^2^, conventional R-factors R are based 
 on F, with F set to zero for negative F^2^. The threshold expression of 
 F^2^ > 2sigma(F^2^) is used only for calculating R-factors(gt) etc. and is 
 not relevant to the choice of reflections for refinement.  R-factors based 
 on F^2^ are statistically about twice as large as those based on F, and R- 
 factors based on ALL data will be even larger. 
; 
 
_refine_ls_structure_factor_coef  Fsqd  
_refine_ls_matrix_type            full 
_refine_ls_weighting_scheme       calc  
_refine_ls_weighting_details 
 'calc w=1/[\s^2^(Fo^2^)+(0.0564P)^2^+0.0980P] where P=(Fo^2^+2Fc^2^)/3' 
_atom_sites_solution_primary      direct 
_atom_sites_solution_secondary    difmap 
_atom_sites_solution_hydrogens    geom 
_refine_ls_hydrogen_treatment     mixed 
_refine_ls_extinction_method      none 
_refine_ls_extinction_coef        ? 
_refine_ls_abs_structure_details 
 'Flack H D (1983), Acta Cryst. A39, 876-881' 
_refine_ls_abs_structure_Flack    0.026(13) 
_refine_ls_number_reflns          5157 
_refine_ls_number_parameters      499 
_refine_ls_number_restraints      1 
_refine_ls_R_factor_all           0.0330 
_refine_ls_R_factor_gt            0.0317 
_refine_ls_wR_factor_ref          0.0866 
_refine_ls_wR_factor_gt           0.0852 
_refine_ls_goodness_of_fit_ref    1.043 
_refine_ls_restrained_S_all       1.043 
_refine_ls_shift/su_max           0.003 
_refine_ls_shift/su_mean          0.000 
 
loop_ 
 _atom_site_label 
 _atom_site_type_symbol 
 _atom_site_fract_x 
 _atom_site_fract_y 
 _atom_site_fract_z 
 _atom_site_U_iso_or_equiv 
 _atom_site_adp_type 
 _atom_site_occupancy 
 _atom_site_symmetry_multiplicity 
 _atom_site_calc_flag 
 _atom_site_refinement_flags 
 _atom_site_disorder_assembly 
 _atom_site_disorder_group 
Si1 Si 0.40094(4) 0.08034(7) 0.05465(2) 0.02447(14) Uani 1 1 d . . . 
H1 H 0.4645(19) 0.166(4) 0.1046(11) 0.029 Uiso 1 1 d . . . 
Si2 Si 0.10031(4) 0.68388(8) 0.44822(2) 0.02441(14) Uani 1 1 d . . . 
H2 H 0.0396(19) 0.776(4) 0.3988(11) 0.029 Uiso 1 1 d . . . 
S1 S 0.30742(4) 0.27555(8) 0.18376(2) 0.03249(14) Uani 1 1 d . . . 
S2 S 0.20401(5) 0.89978(8) 0.32094(2) 0.03115(14) Uani 1 1 d . . . 
C1 C 0.28096(16) 0.2252(3) 0.02243(9) 0.0228(4) Uani 1 1 d . . . 
C2 C 0.25306(17) 0.3694(3) 0.05773(9) 0.0259(5) Uani 1 1 d . . . 
C3 C 0.16216(18) 0.4637(3) 0.03534(10) 0.0300(5) Uani 1 1 d . . . 
H3A H 0.1443 0.5560 0.0599 0.036 Uiso 1 1 calc R . . 
C4 C 0.09389(17) 0.4287(3) -0.02300(10) 0.0274(5) Uani 1 1 d . . . 
C5 C 0.12201(16) 0.2935(3) -0.06011(9) 0.0244(4) Uani 1 1 d . . . 
C6 C 0.21598(16) 0.1913(3) -0.03596(9) 0.0226(4) Uani 1 1 d . . . 
C7 C -0.00165(18) 0.5250(3) -0.04540(11) 0.0355(5) Uani 1 1 d . . . 
H7A H -0.0215 0.6149 -0.0205 0.043 Uiso 1 1 calc R . . 
C8 C -0.06486(19) 0.4898(4) -0.10211(12) 0.0406(6) Uani 1 1 d . . . 
H8A H -0.1290 0.5543 -0.1163 0.049 Uiso 1 1 calc R . . 
C9 C -0.03625(19) 0.3589(4) -0.13998(12) 0.0411(6) Uani 1 1 d . . . 
H9A H -0.0800 0.3376 -0.1800 0.049 Uiso 1 1 calc R . . 
C10 C 0.05472(17) 0.2614(4) -0.11950(10) 0.0317(5) Uani 1 1 d . . . 
H10A H 0.0727 0.1719 -0.1452 0.038 Uiso 1 1 calc R . . 
C11 C 0.24017(16) 0.0453(3) -0.07500(9) 0.0233(4) Uani 1 1 d . . . 
C12 C 0.20885(18) -0.1170(3) -0.06259(10) 0.0286(5) Uani 1 1 d . . . 
H12A H 0.1702 -0.1346 -0.0296 0.034 Uiso 1 1 calc R . . 
C13 C 0.2330(2) -0.2586(3) -0.09797(11) 0.0338(5) Uani 1 1 d . . . 
H13A H 0.2114 -0.3701 -0.0881 0.041 Uiso 1 1 calc R . . 
C14 C 0.28707(19) -0.2356(3) -0.14621(10) 0.0333(5) Uani 1 1 d . . . 
H14A H 0.3046 -0.3317 -0.1690 0.040 Uiso 1 1 calc R . . 
C15 C 0.31725(17) -0.0698(3) -0.16256(9) 0.0277(5) Uani 1 1 d . . . 
C16 C 0.29335(15) 0.0729(3) -0.12705(9) 0.0236(4) Uani 1 1 d . . . 
C17 C 0.37032(18) -0.0420(4) -0.21366(10) 0.0336(5) Uani 1 1 d . . . 
H17A H 0.3884 -0.1369 -0.2369 0.040 Uiso 1 1 calc R . . 
C18 C 0.39570(19) 0.1177(4) -0.22986(10) 0.0374(6) Uani 1 1 d . . . 
H18A H 0.4294 0.1337 -0.2650 0.045 Uiso 1 1 calc R . . 
C19 C 0.37276(18) 0.2600(4) -0.19516(10) 0.0346(5) Uani 1 1 d . . . 
H19A H 0.3918 0.3713 -0.2066 0.042 Uiso 1 1 calc R . . 
C20 C 0.32280(18) 0.2381(3) -0.14461(10) 0.0287(5) Uani 1 1 d . . . 
H20A H 0.3079 0.3347 -0.1212 0.034 Uiso 1 1 calc R . . 
C21 C 0.32091(19) 0.4209(3) 0.12025(10) 0.0314(5) Uani 1 1 d . . . 
H21A H 0.2992 0.5369 0.1311 0.038 Uiso 1 1 calc R . . 
H21B H 0.3981 0.4257 0.1163 0.038 Uiso 1 1 calc R . . 
C22 C 0.49049(19) 0.0329(3) -0.00280(11) 0.0316(5) Uani 1 1 d . . . 
H22A H 0.5610 -0.0085 0.0197 0.047 Uiso 1 1 calc R . . 
H22B H 0.5010 0.1371 -0.0259 0.047 Uiso 1 1 calc R . . 
H22C H 0.4564 -0.0548 -0.0324 0.047 Uiso 1 1 calc R . . 
C23 C 0.35591(18) -0.1246(3) 0.08588(10) 0.0314(5) Uani 1 1 d . . . 
H23A H 0.4172 -0.1770 0.1145 0.047 Uiso 1 1 calc R . . 
H23B H 0.3299 -0.2026 0.0509 0.047 Uiso 1 1 calc R . . 
H23C H 0.2971 -0.1015 0.1086 0.047 Uiso 1 1 calc R . . 
C24 C 0.1739(2) 0.3270(4) 0.19781(11) 0.0412(6) Uani 1 1 d . . . 
H24A H 0.1238 0.3407 0.1569 0.049 Uiso 1 1 calc R . . 
H24B H 0.1473 0.2299 0.2199 0.049 Uiso 1 1 calc R . . 
C25 C 0.1700(2) 0.4865(5) 0.23591(13) 0.0545(8) Uani 1 1 d . . . 
H25A H 0.0950 0.5082 0.2405 0.082 Uiso 1 1 calc R . . 
H25B H 0.1964 0.5834 0.2146 0.082 Uiso 1 1 calc R . . 
H25C H 0.2160 0.4718 0.2775 0.082 Uiso 1 1 calc R . . 
C26 C 0.22081(15) 0.8262(3) 0.48249(9) 0.0222(4) Uani 1 1 d . . . 
C27 C 0.24930(17) 0.9723(3) 0.44869(9) 0.0241(4) Uani 1 1 d . . . 
C28 C 0.34122(17) 1.0648(3) 0.47211(9) 0.0268(5) Uani 1 1 d . . . 
H28A H 0.3588 1.1605 0.4491 0.032 Uiso 1 1 calc R . . 
C29 C 0.41042(16) 1.0221(3) 0.52941(9) 0.0247(4) Uani 1 1 d . . . 
C30 C 0.38176(15) 0.8831(3) 0.56473(9) 0.0229(4) Uani 1 1 d . . . 
C31 C 0.28572(16) 0.7864(3) 0.54021(9) 0.0214(4) Uani 1 1 d . . . 
C32 C 0.50701(17) 1.1148(3) 0.55241(10) 0.0309(5) Uani 1 1 d . . . 
H32A H 0.5272 1.2068 0.5285 0.037 Uiso 1 1 calc R . . 
C33 C 0.57096(18) 1.0729(3) 0.60848(11) 0.0333(5) Uani 1 1 d . . . 
H33A H 0.6353 1.1361 0.6234 0.040 Uiso 1 1 calc R . . 
C34 C 0.54239(17) 0.9366(3) 0.64445(10) 0.0322(5) Uani 1 1 d . . . 
H34A H 0.5872 0.9091 0.6837 0.039 Uiso 1 1 calc R . . 
C35 C 0.45018(17) 0.8434(3) 0.62306(9) 0.0273(4) Uani 1 1 d . . . 
H35A H 0.4318 0.7513 0.6475 0.033 Uiso 1 1 calc R . . 
C36 C 0.26023(16) 0.6396(3) 0.57907(9) 0.0231(4) Uani 1 1 d . . . 
C37 C 0.29552(18) 0.4782(3) 0.56910(10) 0.0296(5) Uani 1 1 d . . . 
H37A H 0.3366 0.4601 0.5372 0.035 Uiso 1 1 calc R . . 
C38 C 0.2718(2) 0.3376(3) 0.60548(11) 0.0364(5) Uani 1 1 d . . . 
H38A H 0.2964 0.2265 0.5974 0.044 Uiso 1 1 calc R . . 
C39 C 0.2140(2) 0.3612(3) 0.65186(11) 0.0357(6) Uani 1 1 d . . . 
H39A H 0.1978 0.2660 0.6756 0.043 Uiso 1 1 calc R . . 
C40 C 0.17800(17) 0.5257(3) 0.66509(9) 0.0295(5) Uani 1 1 d . . . 
C41 C 0.20227(15) 0.6684(3) 0.62888(9) 0.0251(5) Uani 1 1 d . . . 
C42 C 0.11851(19) 0.5544(4) 0.71342(11) 0.0394(6) Uani 1 1 d . . . 
H42A H 0.1011 0.4605 0.7374 0.047 Uiso 1 1 calc R . . 
C43 C 0.08606(19) 0.7138(4) 0.72608(11) 0.0429(7) Uani 1 1 d . . . 
H43A H 0.0463 0.7301 0.7587 0.051 Uiso 1 1 calc R . . 
C44 C 0.11083(19) 0.8551(4) 0.69135(10) 0.0378(6) Uani 1 1 d . . . 
H44A H 0.0884 0.9663 0.7009 0.045 Uiso 1 1 calc R . . 
C45 C 0.16745(17) 0.8327(3) 0.64357(10) 0.0293(5) Uani 1 1 d . . . 
H45A H 0.1833 0.9288 0.6202 0.035 Uiso 1 1 calc R . . 
C46 C 0.18235(17) 1.0298(3) 0.38685(9) 0.0269(5) Uani 1 1 d . . . 
H46A H 0.2007 1.1499 0.3792 0.032 Uiso 1 1 calc R . . 
H46B H 0.1045 1.0255 0.3895 0.032 Uiso 1 1 calc R . . 
C47 C 0.00825(19) 0.6326(3) 0.50408(11) 0.0318(5) Uani 1 1 d . . . 
H47A H -0.0616 0.5917 0.4805 0.048 Uiso 1 1 calc R . . 
H47B H -0.0034 0.7356 0.5276 0.048 Uiso 1 1 calc R . . 
H47C H 0.0415 0.5438 0.5334 0.048 Uiso 1 1 calc R . . 
C48 C 0.14772(18) 0.4824(3) 0.41658(10) 0.0323(5) Uani 1 1 d . . . 
H48A H 0.0856 0.4227 0.3914 0.048 Uiso 1 1 calc R . . 
H48B H 0.1818 0.4092 0.4515 0.048 Uiso 1 1 calc R . . 
H48C H 0.2006 0.5094 0.3902 0.048 Uiso 1 1 calc R . . 
C49 C 0.3396(2) 0.9696(4) 0.31645(11) 0.0390(6) Uani 1 1 d . . . 
H49A H 0.3396 1.0946 0.3094 0.047 Uiso 1 1 calc R . . 
H49B H 0.3895 0.9447 0.3566 0.047 Uiso 1 1 calc R . . 
C50 C 0.3783(3) 0.8794(4) 0.26352(13) 0.0587(9) Uani 1 1 d . . . 
H50A H 0.4514 0.9193 0.2611 0.088 Uiso 1 1 calc R . . 
H50B H 0.3287 0.9042 0.2239 0.088 Uiso 1 1 calc R . . 
H50C H 0.3800 0.7559 0.2711 0.088 Uiso 1 1 calc R . . 
 
loop_ 
 _atom_site_aniso_label 
 _atom_site_aniso_U_11 
 _atom_site_aniso_U_22 
 _atom_site_aniso_U_33 
 _atom_site_aniso_U_23 
 _atom_site_aniso_U_13 
 _atom_site_aniso_U_12 
Si1 0.0222(3) 0.0290(3) 0.0213(3) 0.0001(2) 0.0020(2) 0.0010(2) 
Si2 0.0201(3) 0.0302(3) 0.0218(3) -0.0017(2) 0.0012(2) -0.0016(2) 
S1 0.0366(3) 0.0400(3) 0.0207(2) -0.0014(2) 0.0051(2) -0.0005(3) 
S2 0.0390(3) 0.0345(3) 0.0186(2) -0.0008(2) 0.00231(19) 0.0071(2) 
C1 0.0223(9) 0.0254(11) 0.0222(9) 0.0018(8) 0.0078(7) -0.0006(8) 
C2 0.0314(11) 0.0244(11) 0.0239(10) 0.0004(9) 0.0100(8) -0.0030(9) 
C3 0.0380(12) 0.0256(12) 0.0300(11) -0.0009(9) 0.0157(9) 0.0024(10) 
C4 0.0279(10) 0.0282(11) 0.0290(10) 0.0056(9) 0.0123(8) 0.0020(9) 
C5 0.0230(9) 0.0278(12) 0.0236(9) 0.0048(9) 0.0072(8) 0.0001(9) 
C6 0.0235(10) 0.0244(11) 0.0210(9) 0.0004(9) 0.0072(7) -0.0019(8) 
C7 0.0325(11) 0.0347(13) 0.0430(12) 0.0062(11) 0.0169(10) 0.0077(10) 
C8 0.0267(11) 0.0448(15) 0.0505(14) 0.0132(13) 0.0078(10) 0.0080(11) 
C9 0.0284(11) 0.0535(17) 0.0382(12) 0.0052(12) -0.0016(9) 0.0011(12) 
C10 0.0280(11) 0.0372(13) 0.0289(10) 0.0038(10) 0.0029(8) 0.0041(10) 
C11 0.0216(10) 0.0290(12) 0.0176(9) -0.0013(9) 0.0002(7) 0.0025(9) 
C12 0.0319(11) 0.0309(12) 0.0234(10) 0.0007(9) 0.0060(8) -0.0001(9) 
C13 0.0417(13) 0.0256(12) 0.0344(11) -0.0033(10) 0.0079(9) -0.0037(10) 
C14 0.0369(12) 0.0325(12) 0.0303(11) -0.0068(11) 0.0061(9) 0.0009(11) 
C15 0.0241(10) 0.0377(13) 0.0193(9) -0.0060(10) -0.0006(8) 0.0033(9) 
C16 0.0199(9) 0.0323(12) 0.0175(9) -0.0015(9) 0.0004(7) 0.0003(9) 
C17 0.0321(12) 0.0454(15) 0.0241(10) -0.0087(10) 0.0076(9) 0.0028(11) 
C18 0.0350(12) 0.0558(17) 0.0236(10) -0.0026(11) 0.0116(9) -0.0006(12) 
C19 0.0358(12) 0.0412(14) 0.0280(10) 0.0056(11) 0.0091(9) -0.0026(11) 
C20 0.0284(11) 0.0341(13) 0.0234(10) -0.0005(10) 0.0048(8) 0.0028(9) 
C21 0.0424(13) 0.0256(11) 0.0269(10) -0.0030(10) 0.0082(9) -0.0045(10) 
C22 0.0262(10) 0.0377(13) 0.0315(10) 0.0037(10) 0.0068(8) 0.0023(10) 
C23 0.0322(11) 0.0330(13) 0.0289(10) 0.0046(10) 0.0054(9) 0.0028(10) 
C24 0.0410(13) 0.0533(16) 0.0309(11) -0.0017(12) 0.0107(10) -0.0024(12) 
C25 0.0501(16) 0.065(2) 0.0489(15) -0.0173(15) 0.0115(12) 0.0052(15) 
C26 0.0201(9) 0.0279(11) 0.0190(9) -0.0035(8) 0.0051(7) -0.0004(8) 
C27 0.0291(10) 0.0255(11) 0.0189(9) -0.0029(8) 0.0076(8) 0.0025(9) 
C28 0.0317(11) 0.0274(12) 0.0230(9) -0.0003(9) 0.0094(8) -0.0003(9) 
C29 0.0258(10) 0.0276(11) 0.0220(9) -0.0051(9) 0.0079(8) -0.0007(9) 
C30 0.0211(9) 0.0292(12) 0.0188(9) -0.0038(8) 0.0050(7) 0.0031(9) 
C31 0.0220(9) 0.0234(11) 0.0194(9) -0.0004(8) 0.0055(7) 0.0010(8) 
C32 0.0285(11) 0.0331(12) 0.0337(11) -0.0057(10) 0.0122(9) -0.0063(9) 
C33 0.0234(10) 0.0401(14) 0.0360(11) -0.0119(11) 0.0048(9) -0.0054(10) 
C34 0.0262(11) 0.0415(14) 0.0268(10) -0.0062(10) -0.0003(8) 0.0023(10) 
C35 0.0273(10) 0.0327(12) 0.0211(9) -0.0020(9) 0.0026(8) 0.0021(9) 
C36 0.0202(9) 0.0296(11) 0.0180(9) 0.0016(9) -0.0001(7) -0.0010(8) 
C37 0.0327(11) 0.0299(12) 0.0258(10) -0.0004(9) 0.0051(9) 0.0002(10) 
C38 0.0451(14) 0.0276(12) 0.0369(12) 0.0063(11) 0.0089(10) 0.0047(11) 
C39 0.0402(13) 0.0332(14) 0.0325(12) 0.0105(10) 0.0037(10) -0.0052(11) 
C40 0.0253(10) 0.0423(14) 0.0195(9) 0.0064(10) 0.0008(8) -0.0042(10) 
C41 0.0190(9) 0.0362(12) 0.0181(9) 0.0029(9) -0.0015(7) -0.0020(9) 
C42 0.0306(12) 0.0629(18) 0.0251(11) 0.0087(12) 0.0065(9) -0.0066(12) 
C43 0.0326(12) 0.071(2) 0.0276(11) -0.0027(13) 0.0116(9) -0.0007(13) 
C44 0.0327(12) 0.0517(16) 0.0288(11) -0.0070(11) 0.0053(9) 0.0043(11) 
C45 0.0262(10) 0.0385(13) 0.0225(10) -0.0008(10) 0.0033(8) -0.0005(10) 
C46 0.0334(11) 0.0265(11) 0.0207(9) 0.0003(9) 0.0053(8) 0.0046(9) 
C47 0.0260(10) 0.0376(14) 0.0323(10) -0.0059(10) 0.0067(8) -0.0039(10) 
C48 0.0277(11) 0.0368(13) 0.0328(11) -0.0090(10) 0.0071(9) -0.0042(10) 
C49 0.0482(14) 0.0349(13) 0.0388(12) 0.0070(11) 0.0207(11) 0.0043(11) 
C50 0.085(2) 0.0509(19) 0.0523(16) 0.0115(14) 0.0436(16) 0.0194(16) 
 
_geom_special_details 
; 
 All esds (except the esd in the dihedral angle between two l.s. planes) 
 are estimated using the full covariance matrix.  The cell esds are taken 
 into account individually in the estimation of esds in distances, angles 
 and torsion angles; correlations between esds in cell parameters are only 
 used when they are defined by crystal symmetry.  An approximate (isotropic) 
 treatment of cell esds is used for estimating esds involving l.s. planes. 
; 
 
loop_ 
 _geom_bond_atom_site_label_1 
 _geom_bond_atom_site_label_2 
 _geom_bond_distance 
 _geom_bond_site_symmetry_2 
 _geom_bond_publ_flag 
Si1 C22 1.870(2) . ? 
Si1 C23 1.871(2) . ? 
Si1 C1 1.907(2) . ? 
Si2 C48 1.863(2) . ? 
Si2 C47 1.873(2) . ? 
Si2 C26 1.910(2) . ? 
S1 C24 1.806(3) . ? 
S1 C21 1.821(2) . ? 
S2 C49 1.808(3) . ? 
S2 C46 1.819(2) . ? 
C1 C6 1.394(3) . ? 
C1 C2 1.445(3) . ? 
C2 C3 1.367(3) . ? 
C2 C21 1.511(3) . ? 
C3 C4 1.413(3) . ? 
C4 C5 1.415(3) . ? 
C4 C7 1.421(3) . ? 
C5 C10 1.421(3) . ? 
C5 C6 1.438(3) . ? 
C6 C11 1.489(3) . ? 
C7 C8 1.358(4) . ? 
C8 C9 1.403(4) . ? 
C9 C10 1.374(3) . ? 
C11 C12 1.372(3) . ? 
C11 C16 1.435(3) . ? 
C12 C13 1.414(3) . ? 
C13 C14 1.366(3) . ? 
C14 C15 1.416(4) . ? 
C15 C17 1.417(3) . ? 
C15 C16 1.422(3) . ? 
C16 C20 1.417(3) . ? 
C17 C18 1.353(4) . ? 
C18 C19 1.406(4) . ? 
C19 C20 1.375(3) . ? 
C24 C25 1.504(4) . ? 
C26 C31 1.392(3) . ? 
C26 C27 1.441(3) . ? 
C27 C28 1.374(3) . ? 
C27 C46 1.509(3) . ? 
C28 C29 1.413(3) . ? 
C29 C30 1.417(3) . ? 
C29 C32 1.419(3) . ? 
C30 C35 1.421(3) . ? 
C30 C31 1.436(3) . ? 
C31 C36 1.496(3) . ? 
C32 C33 1.363(3) . ? 
C33 C34 1.409(4) . ? 
C34 C35 1.371(3) . ? 
C36 C37 1.370(3) . ? 
C36 C41 1.433(3) . ? 
C37 C38 1.419(3) . ? 
C38 C39 1.362(3) . ? 
C39 C40 1.413(4) . ? 
C40 C42 1.418(3) . ? 
C40 C41 1.433(3) . ? 
C41 C45 1.414(4) . ? 
C42 C43 1.357(4) . ? 
C43 C44 1.407(4) . ? 
C44 C45 1.377(3) . ? 
C49 C50 1.507(3) . ? 
 
loop_ 
 _geom_angle_atom_site_label_1 
 _geom_angle_atom_site_label_2 
 _geom_angle_atom_site_label_3 
 _geom_angle 
 _geom_angle_site_symmetry_1 
 _geom_angle_site_symmetry_3 
 _geom_angle_publ_flag 
C22 Si1 C23 109.48(11) . . ? 
C22 Si1 C1 114.03(10) . . ? 
C23 Si1 C1 111.75(10) . . ? 
C48 Si2 C47 109.76(12) . . ? 
C48 Si2 C26 110.63(10) . . ? 
C47 Si2 C26 114.45(10) . . ? 
C24 S1 C21 102.32(12) . . ? 
C49 S2 C46 99.09(11) . . ? 
C6 C1 C2 118.16(19) . . ? 
C6 C1 Si1 120.15(16) . . ? 
C2 C1 Si1 121.67(15) . . ? 
C3 C2 C1 120.28(19) . . ? 
C3 C2 C21 117.5(2) . . ? 
C1 C2 C21 122.2(2) . . ? 
C2 C3 C4 122.3(2) . . ? 
C3 C4 C5 118.7(2) . . ? 
C3 C4 C7 122.0(2) . . ? 
C5 C4 C7 119.2(2) . . ? 
C4 C5 C10 118.6(2) . . ? 
C4 C5 C6 119.06(18) . . ? 
C10 C5 C6 122.3(2) . . ? 
C1 C6 C5 121.34(19) . . ? 
C1 C6 C11 121.08(18) . . ? 
C5 C6 C11 117.57(17) . . ? 
C8 C7 C4 120.6(2) . . ? 
C7 C8 C9 120.6(2) . . ? 
C10 C9 C8 120.4(2) . . ? 
C9 C10 C5 120.5(2) . . ? 
C12 C11 C16 119.3(2) . . ? 
C12 C11 C6 120.11(18) . . ? 
C16 C11 C6 120.6(2) . . ? 
C11 C12 C13 121.3(2) . . ? 
C14 C13 C12 120.2(2) . . ? 
C13 C14 C15 120.7(2) . . ? 
C14 C15 C17 121.7(2) . . ? 
C14 C15 C16 119.33(19) . . ? 
C17 C15 C16 118.9(2) . . ? 
C20 C16 C15 118.57(18) . . ? 
C20 C16 C11 122.3(2) . . ? 
C15 C16 C11 119.1(2) . . ? 
C18 C17 C15 121.0(2) . . ? 
C17 C18 C19 120.7(2) . . ? 
C20 C19 C18 120.1(3) . . ? 
C19 C20 C16 120.7(2) . . ? 
C2 C21 S1 113.25(16) . . ? 
C25 C24 S1 114.0(2) . . ? 
C31 C26 C27 118.47(18) . . ? 
C31 C26 Si2 120.13(16) . . ? 
C27 C26 Si2 121.36(14) . . ? 
C28 C27 C26 120.20(19) . . ? 
C28 C27 C46 117.1(2) . . ? 
C26 C27 C46 122.66(19) . . ? 
C27 C28 C29 122.0(2) . . ? 
C28 C29 C30 118.76(19) . . ? 
C28 C29 C32 121.8(2) . . ? 
C30 C29 C32 119.43(19) . . ? 
C29 C30 C35 118.53(19) . . ? 
C29 C30 C31 119.13(18) . . ? 
C35 C30 C31 122.3(2) . . ? 
C26 C31 C30 121.29(19) . . ? 
C26 C31 C36 121.87(18) . . ? 
C30 C31 C36 116.84(17) . . ? 
C33 C32 C29 120.5(2) . . ? 
C32 C33 C34 120.6(2) . . ? 
C35 C34 C33 120.2(2) . . ? 
C34 C35 C30 120.7(2) . . ? 
C37 C36 C41 119.4(2) . . ? 
C37 C36 C31 120.57(18) . . ? 
C41 C36 C31 120.0(2) . . ? 
C36 C37 C38 121.3(2) . . ? 
C39 C38 C37 120.3(2) . . ? 
C38 C39 C40 120.7(2) . . ? 
C39 C40 C42 122.0(2) . . ? 
C39 C40 C41 119.3(2) . . ? 
C42 C40 C41 118.7(2) . . ? 
C45 C41 C40 118.57(19) . . ? 
C45 C41 C36 122.5(2) . . ? 
C40 C41 C36 118.9(2) . . ? 
C43 C42 C40 121.1(2) . . ? 
C42 C43 C44 120.6(2) . . ? 
C45 C44 C43 120.2(3) . . ? 
C44 C45 C41 120.8(2) . . ? 
C27 C46 S2 113.02(15) . . ? 
C50 C49 S2 110.1(2) . . ? 
 
_diffrn_measured_fraction_theta_max    0.997 
_diffrn_reflns_theta_full              67.49 
_diffrn_measured_fraction_theta_full   0.997 
_refine_diff_density_max    0.350 
_refine_diff_density_min   -0.322 
_refine_diff_density_rms    0.041 
#===END


data_cu-1097 
 
_audit_creation_method
;
CrysAlisPro, Agilent Technologies,
Version 1.171.37.35 (release 13-08-2014 CrysAlis171 .NET)
(compiled Aug 13 2014,18:06:01)
;
_chemical_name_systematic 
; 
 ? 
; 
_chemical_name_common             ? 
_chemical_melting_point           ? 
_chemical_formula_moiety          ? 
_chemical_formula_sum 
 'C31 H28 S Si' 
_chemical_formula_weight          460.68 
_chemical_absolute_configuration  ad
 
loop_ 
 _atom_type_symbol 
 _atom_type_description 
 _atom_type_scat_dispersion_real 
 _atom_type_scat_dispersion_imag 
 _atom_type_scat_source 
 'C'  'C'   0.0181   0.0091 
 'International Tables Vol C Tables 4.2.6.8 and 6.1.1.4' 
 'H'  'H'   0.0000   0.0000 
 'International Tables Vol C Tables 4.2.6.8 and 6.1.1.4' 
 'Si'  'Si'   0.2541   0.3302 
 'International Tables Vol C Tables 4.2.6.8 and 6.1.1.4' 
 'S'  'S'   0.3331   0.5567 
 'International Tables Vol C Tables 4.2.6.8 and 6.1.1.4' 
 
_symmetry_cell_setting            monoclinic 
_symmetry_space_group_name_H-M    P21 
 
loop_ 
 _symmetry_equiv_pos_as_xyz 
 'x, y, z' 
 '-x, y+1/2, -z' 
 
_cell_length_a                    8.5421(3) 
_cell_length_b                    33.3539(12) 
_cell_length_c                    8.7758(2) 
_cell_angle_alpha                 90.00 
_cell_angle_beta                  99.854(3) 
_cell_angle_gamma                 90.00 
_cell_volume                      2463.43(14) 
_cell_formula_units_Z             4 
_cell_measurement_temperature     150(2) 
_cell_measurement_reflns_used     2004
_cell_measurement_theta_min       2.6370
_cell_measurement_theta_max       72.0800
 
_exptl_crystal_description        plate 
_exptl_crystal_colour             colourless 
_exptl_crystal_size_max           0.16 
_exptl_crystal_size_mid           0.09 
_exptl_crystal_size_min           0.03 
_exptl_crystal_density_meas       ? 
_exptl_crystal_density_diffrn     1.242 
_exptl_crystal_density_method     'not measured' 
_exptl_crystal_F_000              976 
_exptl_absorpt_coefficient_mu     1.745 
_exptl_absorpt_correction_type    'multi-scan'
_exptl_absorpt_correction_T_min   0.7677 
_exptl_absorpt_correction_T_max   0.9495 
_exptl_absorpt_process_details
;
CrysAlisPro, Agilent Technologies,
Version 1.171.37.35 (release 13-08-2014 CrysAlis171 .NET)
(compiled Aug 13 2014,18:06:01)
Empirical absorption correction using spherical harmonics,
 implemented in SCALE3 ABSPACK scaling algorithm.
;
 
_exptl_special_details 
; 
 ? 
; 
 
_diffrn_ambient_temperature       150.00(10) 
_diffrn_ambient_environment       'N~2~'
_diffrn_source                    'sealed X-ray tube'
_diffrn_source_type               'SuperNova (Cu) X-ray Source'
_diffrn_radiation_probe           'x-ray'
_diffrn_radiation_type            'Cu K\a'
_diffrn_radiation_wavelength       1.54184
_diffrn_radiation_monochromator   'mirror'
_diffrn_measurement_device        'four-circle diffractometer'
_diffrn_measurement_device_type   'SuperNova, Single source at offset, Atlas'
_diffrn_detector                  'CCD plate'
_diffrn_detector_type             'Atlas'
_diffrn_measurement_method        '\w scans'
_diffrn_detector_area_resol_mean  10.5435
_diffrn_standards_number          ? 
_diffrn_standards_interval_count  ? 
_diffrn_standards_interval_time   ? 
_diffrn_standards_decay_%         ? 
_diffrn_reflns_number             9345 
_diffrn_reflns_av_R_equivalents   0.0545 
_diffrn_reflns_av_sigmaI/netI     0.0957 
_diffrn_reflns_limit_h_min        -8 
_diffrn_reflns_limit_h_max        10 
_diffrn_reflns_limit_k_min        -39 
_diffrn_reflns_limit_k_max        36 
_diffrn_reflns_limit_l_min        -8 
_diffrn_reflns_limit_l_max        10 
_diffrn_reflns_theta_min          2.65 
_diffrn_reflns_theta_max          67.48 
_reflns_number_total              6699 
_reflns_number_gt                 4976 
_reflns_threshold_expression      >2sigma(I) 
 
_computing_data_collection
;
CrysAlisPro, Agilent Technologies,
Version 1.171.37.35 (release 13-08-2014 CrysAlis171 .NET)
(compiled Aug 13 2014,18:06:01)
;
_computing_cell_refinement
;
CrysAlisPro, Agilent Technologies,
Version 1.171.37.35 (release 13-08-2014 CrysAlis171 .NET)
(compiled Aug 13 2014,18:06:01)
;
_computing_data_reduction
;
CrysAlisPro, Agilent Technologies,
Version 1.171.37.35 (release 13-08-2014 CrysAlis171 .NET)
(compiled Aug 13 2014,18:06:01)
;
_computing_structure_solution     'SHELXS-97 (Sheldrick, 1990)' 
_computing_structure_refinement   'SHELXL-97 (Sheldrick, 1997)' 
_computing_molecular_graphics     ? 
_computing_publication_material   ? 
 
_refine_special_details 
; 
 Refinement of F^2^ against ALL reflections.  The weighted R-factor wR and 
 goodness of fit S are based on F^2^, conventional R-factors R are based 
 on F, with F set to zero for negative F^2^. The threshold expression of 
 F^2^ > 2sigma(F^2^) is used only for calculating R-factors(gt) etc. and is 
 not relevant to the choice of reflections for refinement.  R-factors based 
 on F^2^ are statistically about twice as large as those based on F, and R- 
 factors based on ALL data will be even larger. 
; 
 
_refine_ls_structure_factor_coef  Fsqd  
_refine_ls_matrix_type            full 
_refine_ls_weighting_scheme       calc  
_refine_ls_weighting_details 
 'calc w=1/[\s^2^(Fo^2^)+(0.0496P)^2^+0.4244P] where P=(Fo^2^+2Fc^2^)/3' 
_atom_sites_solution_primary      direct 
_atom_sites_solution_secondary    difmap 
_atom_sites_solution_hydrogens    geom 
_refine_ls_hydrogen_treatment     mixed 
_refine_ls_extinction_method      none 
_refine_ls_extinction_coef        ? 
_refine_ls_abs_structure_details 
 'Flack H D (1983), Acta Cryst. A39, 876-881' 
_refine_ls_abs_structure_Flack    0.02(3) 
_refine_ls_number_reflns          6699 
_refine_ls_number_parameters      655 
_refine_ls_number_restraints      65 
_refine_ls_R_factor_all           0.0867 
_refine_ls_R_factor_gt            0.0557 
_refine_ls_wR_factor_ref          0.1341 
_refine_ls_wR_factor_gt           0.1141 
_refine_ls_goodness_of_fit_ref    1.012 
_refine_ls_restrained_S_all       1.009 
_refine_ls_shift/su_max           0.001 
_refine_ls_shift/su_mean          0.000 
 
loop_ 
 _atom_site_label 
 _atom_site_type_symbol 
 _atom_site_fract_x 
 _atom_site_fract_y 
 _atom_site_fract_z 
 _atom_site_U_iso_or_equiv 
 _atom_site_adp_type 
 _atom_site_occupancy 
 _atom_site_symmetry_multiplicity 
 _atom_site_calc_flag 
 _atom_site_refinement_flags 
 _atom_site_disorder_assembly 
 _atom_site_disorder_group 
Si1 Si 0.78750(16) 0.53940(5) 1.07951(15) 0.0278(3) Uani 1 1 d . . . 
H1 H 0.899(6) 0.5485(17) 1.220(5) 0.033 Uiso 1 1 d . . . 
C1 C 0.7795(6) 0.48313(17) 1.0575(6) 0.0310(12) Uani 1 1 d . . . 
H1A H 0.7670 0.4706 1.1569 0.037 Uiso 1 1 calc R . . 
H1B H 0.6872 0.4755 0.9787 0.037 Uiso 1 1 calc R . . 
Si2 Si 0.18819(17) 0.73426(5) 0.48937(15) 0.0306(3) Uani 1 1 d . . . 
H2 H 0.052(6) 0.7231(17) 0.373(5) 0.037 Uiso 1 1 d . . . 
C2 C 0.9308(6) 0.46854(17) 1.0092(6) 0.0311(12) Uani 1 1 d . . . 
C3 C 1.0473(7) 0.44884(18) 1.1197(7) 0.0391(14) Uani 1 1 d . . . 
H3A H 1.0282 0.4450 1.2222 0.047 Uiso 1 1 calc R . . 
C4 C 1.1851(7) 0.43544(19) 1.0807(8) 0.0454(16) Uani 1 1 d . . . 
H4A H 1.2586 0.4210 1.1540 0.054 Uiso 1 1 calc R . . 
C5 C 1.2198(7) 0.44294(18) 0.9310(8) 0.0442(16) Uani 1 1 d . . . 
C6 C 1.1072(6) 0.4633(2) 0.8223(7) 0.0389(15) Uani 1 1 d . . . 
C7 C 0.9596(6) 0.47504(17) 0.8612(6) 0.0320(13) Uani 1 1 d . . . 
C8 C 1.3676(7) 0.4303(2) 0.8883(11) 0.063(2) Uani 1 1 d . . . 
H8A H 1.4421 0.4155 0.9595 0.076 Uiso 1 1 calc R . . 
C9 C 1.4006(9) 0.4395(2) 0.7472(12) 0.075(3) Uani 1 1 d . . . 
H9A H 1.4988 0.4311 0.7206 0.090 Uiso 1 1 calc R . . 
C10 C 1.2914(8) 0.4613(2) 0.6379(9) 0.063(2) Uani 1 1 d . . . 
H10A H 1.3177 0.4685 0.5406 0.076 Uiso 1 1 calc R . . 
C11 C 1.1480(7) 0.4718(2) 0.6745(7) 0.0527(19) Uani 1 1 d . . . 
H11A H 1.0728 0.4851 0.5992 0.063 Uiso 1 1 calc R . . 
C12 C 0.8519(7) 0.55804(18) 0.8964(6) 0.0350(13) Uani 1 1 d . . . 
H12A H 0.8158 0.5861 0.8772 0.042 Uiso 1 1 calc R . . 
H12B H 0.9694 0.5579 0.9105 0.042 Uiso 1 1 calc R . . 
C13 C 0.7858(6) 0.53272(19) 0.7567(6) 0.0325(13) Uani 1 1 d . . . 
C14 C 0.6678(7) 0.54951(19) 0.6414(6) 0.0368(14) Uani 1 1 d . . . 
H14A H 0.6359 0.5765 0.6519 0.044 Uiso 1 1 calc R . . 
C15 C 0.5985(7) 0.5278(2) 0.5153(6) 0.0428(16) Uani 1 1 d . . . 
H15A H 0.5211 0.5400 0.4387 0.051 Uiso 1 1 calc R . . 
C16 C 0.6416(6) 0.48753(19) 0.4986(6) 0.0332(13) Uani 1 1 d . . . 
C17 C 0.7604(6) 0.46983(19) 0.6122(6) 0.0323(13) Uani 1 1 d . . . 
C18 C 0.8348(6) 0.49381(18) 0.7419(5) 0.0284(12) Uani 1 1 d . . . 
C19 C 0.5631(7) 0.4638(2) 0.3743(6) 0.0423(15) Uani 1 1 d . . . 
H19A H 0.4832 0.4753 0.2984 0.051 Uiso 1 1 calc R . . 
C20 C 0.6025(7) 0.4245(2) 0.3641(6) 0.0427(16) Uani 1 1 d . . . 
H20A H 0.5512 0.4089 0.2794 0.051 Uiso 1 1 calc R . . 
C21 C 0.7178(7) 0.4065(2) 0.4766(6) 0.0403(15) Uani 1 1 d . . . 
H21A H 0.7417 0.3789 0.4696 0.048 Uiso 1 1 calc R . . 
C22 C 0.7956(7) 0.4290(2) 0.5965(6) 0.0391(14) Uani 1 1 d . . . 
H22A H 0.8752 0.4168 0.6709 0.047 Uiso 1 1 calc R . . 
C23 C 0.5876(6) 0.55890(16) 1.1087(5) 0.0251(11) Uani 1 1 d . . . 
C24 C 0.4542(6) 0.53659(18) 1.0429(6) 0.0314(12) Uani 1 1 d . . . 
H24A H 0.4686 0.5134 0.9838 0.038 Uiso 1 1 calc R . . 
C25 C 0.3017(6) 0.54732(19) 1.0616(7) 0.0412(15) Uani 1 1 d . . . 
H25A H 0.2135 0.5312 1.0183 0.049 Uiso 1 1 calc R . . 
C26 C 0.2790(7) 0.5812(2) 1.1427(7) 0.0472(17) Uani 1 1 d . . . 
H26A H 0.1747 0.5891 1.1538 0.057 Uiso 1 1 calc R . . 
C27 C 0.4093(6) 0.60411(19) 1.2089(7) 0.0395(14) Uani 1 1 d . . . 
H27A H 0.3928 0.6277 1.2648 0.047 Uiso 1 1 calc R . . 
C28 C 0.5631(6) 0.59309(17) 1.1947(5) 0.0271(11) Uani 1 1 d . B . 
C29 C 0.6984(6) 0.61791(17) 1.2778(6) 0.0315(12) Uani 1 1 d . . . 
H29A H 0.7761 0.5999 1.3407 0.038 Uiso 1 1 calc R A 1 
H29B H 0.6568 0.6365 1.3494 0.038 Uiso 1 1 calc R A 1 
S1 S 0.7969(10) 0.6461(4) 1.1530(16) 0.046(2) Uani 0.50 1 d P B 1 
C30 C 0.6412(18) 0.6769(5) 1.0446(17) 0.044(2) Uani 0.50 1 d PU B 1 
H30A H 0.5677 0.6854 1.1143 0.053 Uiso 0.50 1 calc PR B 1 
H30B H 0.6898 0.7014 1.0091 0.053 Uiso 0.50 1 calc PR B 1 
C31 C 0.5465(16) 0.6558(4) 0.9051(13) 0.048(3) Uani 0.50 1 d PU B 1 
H31A H 0.4581 0.6729 0.8583 0.072 Uiso 0.50 1 calc PR B 1 
H31B H 0.5048 0.6304 0.9380 0.072 Uiso 0.50 1 calc PR B 1 
H31C H 0.6157 0.6504 0.8292 0.072 Uiso 0.50 1 calc PR B 1 
S1A S 0.8387(10) 0.6379(4) 1.1532(16) 0.0314(14) Uani 0.50 1 d P B 2 
C30A C 0.7033(17) 0.6679(5) 1.0221(17) 0.040(2) Uani 0.50 1 d PU B 2 
H30C H 0.7506 0.6733 0.9287 0.048 Uiso 0.50 1 calc PR B 2 
H30D H 0.6041 0.6525 0.9894 0.048 Uiso 0.50 1 calc PR B 2 
C31A C 0.6616(16) 0.7083(4) 1.0911(14) 0.047(3) Uani 0.50 1 d PU B 2 
H31D H 0.5891 0.7233 1.0129 0.070 Uiso 0.50 1 calc PR B 2 
H31E H 0.7589 0.7238 1.1232 0.070 Uiso 0.50 1 calc PR B 2 
H31F H 0.6102 0.7033 1.1809 0.070 Uiso 0.50 1 calc PR B 2 
C32 C 0.2065(7) 0.79056(19) 0.4958(6) 0.0373(14) Uani 1 1 d . . . 
H32A H 0.1028 0.8027 0.5055 0.045 Uiso 1 1 calc R . . 
H32B H 0.2852 0.7987 0.5869 0.045 Uiso 1 1 calc R . . 
C33 C 0.2586(6) 0.80520(17) 0.3495(5) 0.0276(12) Uani 1 1 d . . . 
C34 C 0.1465(6) 0.82408(17) 0.2334(6) 0.0308(13) Uani 1 1 d . . . 
H34A H 0.0408 0.8282 0.2506 0.037 Uiso 1 1 calc R . . 
C35 C 0.1882(6) 0.83657(17) 0.0963(5) 0.0320(13) Uani 1 1 d . . . 
H35A H 0.1119 0.8496 0.0212 0.038 Uiso 1 1 calc R . . 
C36 C 0.3436(6) 0.83014(17) 0.0663(5) 0.0276(12) Uani 1 1 d . . . 
C37 C 0.4581(6) 0.81190(17) 0.1816(5) 0.0293(12) Uani 1 1 d . . . 
C38 C 0.4139(6) 0.80033(17) 0.3263(5) 0.0285(12) Uani 1 1 d . . . 
C39 C 0.3869(7) 0.84107(17) -0.0768(5) 0.0342(13) Uani 1 1 d . . . 
H39A H 0.3115 0.8538 -0.1537 0.041 Uiso 1 1 calc R . . 
C40 C 0.5371(8) 0.83335(18) -0.1050(6) 0.0401(15) Uani 1 1 d . . . 
H40A H 0.5637 0.8400 -0.2027 0.048 Uiso 1 1 calc R . . 
C41 C 0.6507(7) 0.81596(19) 0.0079(5) 0.0363(14) Uani 1 1 d . . . 
H41A H 0.7553 0.8117 -0.0117 0.044 Uiso 1 1 calc R . . 
C42 C 0.6121(7) 0.80488(19) 0.1486(6) 0.0384(14) Uani 1 1 d . . . 
H42A H 0.6900 0.7924 0.2240 0.046 Uiso 1 1 calc R . . 
C43 C 0.3794(7) 0.71696(19) 0.4259(6) 0.0362(14) Uani 1 1 d . . . 
H43A H 0.4010 0.6888 0.4580 0.043 Uiso 1 1 calc R . . 
H43B H 0.3666 0.7182 0.3117 0.043 Uiso 1 1 calc R . . 
C44 C 0.5178(6) 0.74288(19) 0.4961(5) 0.0325(13) Uani 1 1 d . . . 
C45 C 0.6318(7) 0.72597(18) 0.6167(5) 0.0361(14) Uani 1 1 d . . . 
H45A H 0.6205 0.6989 0.6473 0.043 Uiso 1 1 calc R . . 
C46 C 0.7569(7) 0.74823(18) 0.6887(6) 0.0348(14) Uani 1 1 d . . . 
H46A H 0.8316 0.7362 0.7683 0.042 Uiso 1 1 calc R . . 
C47 C 0.7785(6) 0.78814(19) 0.6489(5) 0.0309(13) Uani 1 1 d . . . 
C48 C 0.6641(6) 0.80596(18) 0.5269(5) 0.0283(12) Uani 1 1 d . . . 
C49 C 0.5355(6) 0.7819(2) 0.4510(5) 0.0326(14) Uani 1 1 d . . . 
C50 C 0.9035(6) 0.8118(2) 0.7235(6) 0.0348(14) Uani 1 1 d . . . 
H50A H 0.9792 0.8002 0.8034 0.042 Uiso 1 1 calc R . . 
C51 C 0.9198(7) 0.8510(2) 0.6845(6) 0.0372(14) Uani 1 1 d . . . 
H51A H 1.0055 0.8666 0.7373 0.045 Uiso 1 1 calc R . . 
C52 C 0.8091(6) 0.8682(2) 0.5661(6) 0.0382(14) Uani 1 1 d . . . 
H52A H 0.8214 0.8954 0.5382 0.046 Uiso 1 1 calc R . . 
C53 C 0.6848(7) 0.84673(18) 0.4908(6) 0.0330(13) Uani 1 1 d . . . 
H53A H 0.6104 0.8593 0.4124 0.040 Uiso 1 1 calc R . . 
C54 C 0.1641(6) 0.71525(16) 0.6867(5) 0.0255(11) Uani 1 1 d . . . 
C55 C 0.2369(6) 0.73737(17) 0.8156(5) 0.0295(12) Uani 1 1 d . . . 
H55A H 0.2977 0.7604 0.8001 0.035 Uiso 1 1 calc R . . 
C56 C 0.2221(7) 0.72643(18) 0.9661(6) 0.0375(14) Uani 1 1 d . . . 
H56A H 0.2693 0.7422 1.0518 0.045 Uiso 1 1 calc R . . 
C57 C 0.1383(7) 0.69245(19) 0.9882(6) 0.0374(14) Uani 1 1 d . . . 
H57A H 0.1289 0.6845 1.0902 0.045 Uiso 1 1 calc R . . 
C58 C 0.0669(7) 0.66958(18) 0.8631(6) 0.0359(14) Uani 1 1 d . . . 
H58A H 0.0104 0.6460 0.8804 0.043 Uiso 1 1 calc R . . 
C59 C 0.0775(6) 0.68103(17) 0.7110(6) 0.0298(12) Uani 1 1 d . D . 
C60 C -0.0072(6) 0.65569(18) 0.5810(6) 0.0355(13) Uani 1 1 d . . . 
H60A H -0.0953 0.6715 0.5222 0.043 Uiso 1 1 calc R C 3 
H60B H -0.0543 0.6322 0.6256 0.043 Uiso 1 1 calc R C 3 
S2 S 0.1233(6) 0.63721(13) 0.4433(5) 0.0299(9) Uani 0.50 1 d P D 3 
C61 C 0.2615(16) 0.6077(4) 0.5771(15) 0.045(2) Uani 0.50 1 d PU D 3 
H61A H 0.3560 0.6019 0.5294 0.054 Uiso 0.50 1 calc PR D 3 
H61B H 0.2972 0.6238 0.6713 0.054 Uiso 0.50 1 calc PR D 3 
C62 C 0.1961(17) 0.5694(4) 0.6228(17) 0.056(3) Uani 0.50 1 d PU D 3 
H62A H 0.2774 0.5552 0.6955 0.085 Uiso 0.50 1 calc PR D 3 
H62B H 0.1637 0.5527 0.5307 0.085 Uiso 0.50 1 calc PR D 3 
H62C H 0.1037 0.5747 0.6723 0.085 Uiso 0.50 1 calc PR D 3 
S2A S 0.1203(7) 0.62429(15) 0.4919(5) 0.0369(10) Uani 0.50 1 d P D 4 
C61A C 0.2321(16) 0.5956(4) 0.6509(17) 0.044(2) Uani 0.50 1 d PU D 4 
H61C H 0.1619 0.5893 0.7265 0.053 Uiso 0.50 1 calc PR D 4 
H61D H 0.2661 0.5700 0.6104 0.053 Uiso 0.50 1 calc PR D 4 
C62A C 0.3779(14) 0.6180(4) 0.7331(14) 0.044(2) Uani 0.50 1 d PU D 4 
H62D H 0.4334 0.6015 0.8177 0.066 Uiso 0.50 1 calc PR D 4 
H62E H 0.3448 0.6433 0.7750 0.066 Uiso 0.50 1 calc PR D 4 
H62F H 0.4494 0.6237 0.6595 0.066 Uiso 0.50 1 calc PR D 4 
 
loop_ 
 _atom_site_aniso_label 
 _atom_site_aniso_U_11 
 _atom_site_aniso_U_22 
 _atom_site_aniso_U_33 
 _atom_site_aniso_U_23 
 _atom_site_aniso_U_13 
 _atom_site_aniso_U_12 
Si1 0.0234(7) 0.0325(9) 0.0280(7) -0.0019(7) 0.0055(6) -0.0005(7) 
C1 0.033(3) 0.031(3) 0.030(3) 0.003(2) 0.008(2) 0.002(3) 
Si2 0.0339(8) 0.0378(10) 0.0208(6) 0.0007(7) 0.0066(6) 0.0008(7) 
C2 0.027(3) 0.028(3) 0.038(3) -0.003(2) 0.005(2) -0.005(2) 
C3 0.040(3) 0.032(3) 0.043(3) 0.001(3) 0.000(3) 0.004(3) 
C4 0.026(3) 0.029(4) 0.079(4) 0.004(3) 0.001(3) 0.010(3) 
C5 0.028(3) 0.024(3) 0.084(5) -0.017(3) 0.018(3) -0.008(3) 
C6 0.023(3) 0.043(4) 0.053(3) -0.022(3) 0.013(3) -0.005(3) 
C7 0.026(3) 0.032(3) 0.039(3) -0.008(3) 0.008(2) -0.003(2) 
C8 0.027(3) 0.034(4) 0.131(7) -0.023(4) 0.021(4) -0.007(3) 
C9 0.043(4) 0.051(5) 0.144(8) -0.044(5) 0.053(5) -0.012(4) 
C10 0.045(4) 0.062(5) 0.094(5) -0.039(5) 0.043(4) -0.025(4) 
C11 0.035(3) 0.072(5) 0.058(4) -0.031(4) 0.026(3) -0.023(3) 
C12 0.038(3) 0.033(3) 0.037(3) -0.007(3) 0.015(2) -0.005(3) 
C13 0.031(3) 0.042(4) 0.027(2) 0.002(3) 0.014(2) -0.007(3) 
C14 0.044(3) 0.038(4) 0.030(3) 0.008(3) 0.008(2) 0.002(3) 
C15 0.055(4) 0.049(4) 0.025(3) 0.008(3) 0.010(3) -0.005(3) 
C16 0.036(3) 0.041(4) 0.025(2) 0.001(3) 0.011(2) -0.005(3) 
C17 0.034(3) 0.039(3) 0.027(3) -0.001(3) 0.014(2) -0.007(3) 
C18 0.024(2) 0.037(3) 0.026(3) -0.004(2) 0.008(2) -0.010(2) 
C19 0.050(4) 0.052(4) 0.025(3) -0.002(3) 0.008(3) -0.012(3) 
C20 0.044(3) 0.057(5) 0.028(3) -0.011(3) 0.009(3) -0.016(3) 
C21 0.042(3) 0.045(4) 0.037(3) -0.013(3) 0.018(3) -0.010(3) 
C22 0.037(3) 0.047(4) 0.035(3) -0.003(3) 0.011(3) -0.006(3) 
C23 0.027(3) 0.024(3) 0.026(2) 0.002(2) 0.008(2) 0.004(2) 
C24 0.030(3) 0.027(3) 0.037(3) -0.006(3) 0.005(2) 0.000(3) 
C25 0.030(3) 0.039(4) 0.052(3) -0.008(3) -0.001(3) 0.000(3) 
C26 0.026(3) 0.041(4) 0.074(4) -0.017(4) 0.010(3) -0.001(3) 
C27 0.033(3) 0.038(4) 0.048(3) -0.008(3) 0.007(3) 0.005(3) 
C28 0.027(3) 0.029(3) 0.024(2) 0.003(2) 0.000(2) -0.001(2) 
C29 0.032(3) 0.034(3) 0.030(3) -0.001(2) 0.011(2) 0.000(3) 
S1 0.036(5) 0.063(7) 0.036(2) 0.004(4) 0.001(4) -0.024(4) 
C30 0.056(6) 0.034(5) 0.041(4) 0.009(4) 0.003(4) 0.003(5) 
C31 0.060(6) 0.038(6) 0.044(5) 0.007(4) 0.005(4) -0.001(5) 
S1A 0.026(4) 0.037(3) 0.032(2) 0.001(2) 0.008(3) -0.003(2) 
C30A 0.050(6) 0.031(5) 0.039(4) 0.006(4) 0.006(4) 0.003(5) 
C31A 0.055(6) 0.034(5) 0.053(5) 0.008(4) 0.010(5) 0.015(5) 
C32 0.040(3) 0.050(4) 0.027(3) 0.010(3) 0.016(2) 0.003(3) 
C33 0.033(3) 0.030(3) 0.021(2) 0.006(2) 0.010(2) -0.002(2) 
C34 0.027(3) 0.034(3) 0.031(3) 0.007(2) 0.004(2) 0.000(2) 
C35 0.039(3) 0.033(3) 0.022(2) 0.005(2) -0.004(2) -0.007(3) 
C36 0.037(3) 0.030(3) 0.015(2) 0.004(2) 0.002(2) -0.010(3) 
C37 0.034(3) 0.034(3) 0.019(2) 0.003(2) 0.002(2) -0.006(3) 
C38 0.033(3) 0.037(3) 0.016(2) 0.003(2) 0.008(2) 0.003(3) 
C39 0.053(4) 0.029(3) 0.021(2) 0.002(2) 0.006(2) -0.001(3) 
C40 0.072(4) 0.033(3) 0.019(2) 0.003(2) 0.018(3) -0.004(3) 
C41 0.046(3) 0.042(4) 0.024(2) 0.001(3) 0.014(2) -0.006(3) 
C42 0.043(3) 0.050(4) 0.023(2) 0.005(3) 0.009(2) 0.003(3) 
C43 0.043(3) 0.038(4) 0.029(3) 0.001(3) 0.010(2) 0.005(3) 
C44 0.035(3) 0.037(3) 0.026(2) -0.005(3) 0.009(2) 0.008(3) 
C45 0.049(3) 0.034(3) 0.028(2) 0.004(3) 0.013(2) 0.012(3) 
C46 0.040(3) 0.039(4) 0.027(2) 0.005(3) 0.010(2) 0.011(3) 
C47 0.031(3) 0.041(4) 0.023(2) -0.001(2) 0.012(2) 0.008(3) 
C48 0.030(3) 0.040(3) 0.018(2) 0.000(2) 0.011(2) 0.007(3) 
C49 0.028(3) 0.053(4) 0.019(2) 0.001(3) 0.011(2) 0.005(3) 
C50 0.030(3) 0.048(4) 0.025(2) 0.005(3) 0.002(2) 0.011(3) 
C51 0.035(3) 0.046(4) 0.032(3) -0.002(3) 0.011(2) 0.003(3) 
C52 0.041(3) 0.043(4) 0.031(3) 0.008(3) 0.006(2) 0.001(3) 
C53 0.040(3) 0.037(3) 0.023(2) 0.004(3) 0.009(2) 0.009(3) 
C54 0.026(3) 0.027(3) 0.024(2) -0.003(2) 0.003(2) 0.002(2) 
C55 0.039(3) 0.028(3) 0.022(2) 0.005(2) 0.005(2) -0.006(3) 
C56 0.049(3) 0.038(4) 0.023(2) 0.000(2) -0.001(2) -0.009(3) 
C57 0.047(3) 0.041(4) 0.023(3) 0.003(3) 0.005(2) -0.005(3) 
C58 0.041(3) 0.031(3) 0.033(3) 0.005(3) 0.000(2) -0.008(3) 
C59 0.030(3) 0.028(3) 0.031(3) 0.001(2) 0.004(2) 0.002(2) 
C60 0.031(3) 0.036(3) 0.039(3) -0.008(3) 0.003(2) -0.002(3) 
S2 0.0321(16) 0.031(2) 0.025(2) -0.0038(16) 0.0022(17) 0.0042(19) 
C61 0.051(5) 0.031(5) 0.051(5) 0.004(4) 0.007(4) 0.010(4) 
C62 0.066(6) 0.037(6) 0.066(6) 0.012(5) 0.011(5) 0.008(5) 
S2A 0.0417(19) 0.037(3) 0.030(2) -0.0077(17) 0.0026(19) 0.006(2) 
C61A 0.053(5) 0.028(5) 0.052(5) 0.006(4) 0.009(4) 0.009(4) 
C62A 0.051(5) 0.028(5) 0.053(5) 0.007(5) 0.009(4) 0.011(4) 
 
_geom_special_details 
; 
 All esds (except the esd in the dihedral angle between two l.s. planes) 
 are estimated using the full covariance matrix.  The cell esds are taken 
 into account individually in the estimation of esds in distances, angles 
 and torsion angles; correlations between esds in cell parameters are only 
 used when they are defined by crystal symmetry.  An approximate (isotropic) 
 treatment of cell esds is used for estimating esds involving l.s. planes. 
; 
 
loop_ 
 _geom_bond_atom_site_label_1 
 _geom_bond_atom_site_label_2 
 _geom_bond_distance 
 _geom_bond_site_symmetry_2 
 _geom_bond_publ_flag 
Si1 C23 1.885(5) . ? 
Si1 C1 1.887(6) . ? 
Si1 C12 1.891(5) . ? 
C1 C2 1.508(7) . ? 
Si2 C32 1.884(7) . ? 
Si2 C54 1.888(5) . ? 
Si2 C43 1.903(6) . ? 
C2 C7 1.380(7) . ? 
C2 C3 1.426(7) . ? 
C3 C4 1.356(8) . ? 
C4 C5 1.418(9) . ? 
C5 C6 1.409(9) . ? 
C5 C8 1.440(8) . ? 
C6 C7 1.416(7) . ? 
C6 C11 1.427(8) . ? 
C7 C18 1.498(7) . ? 
C8 C9 1.351(11) . ? 
C9 C10 1.420(11) . ? 
C10 C11 1.364(8) . ? 
C12 C13 1.516(7) . ? 
C13 C18 1.376(8) . ? 
C13 C14 1.415(7) . ? 
C14 C15 1.370(8) . ? 
C15 C16 1.407(8) . ? 
C16 C19 1.420(8) . ? 
C16 C17 1.424(8) . ? 
C17 C22 1.405(8) . ? 
C17 C18 1.446(7) . ? 
C19 C20 1.361(9) . ? 
C20 C21 1.403(8) . ? 
C21 C22 1.369(8) . ? 
C23 C24 1.400(7) . ? 
C23 C28 1.403(7) . ? 
C24 C25 1.388(7) . ? 
C25 C26 1.367(8) . ? 
C26 C27 1.392(8) . ? 
C27 C28 1.391(7) . ? 
C28 C29 1.504(7) . ? 
C29 S1 1.763(15) . ? 
C29 S1A 1.878(13) . ? 
S1 C30 1.816(17) . ? 
C30 C31 1.519(19) . ? 
S1A C30A 1.791(17) . ? 
C30A C31A 1.542(18) . ? 
C32 C33 1.511(7) . ? 
C33 C38 1.386(7) . ? 
C33 C34 1.421(7) . ? 
C34 C35 1.376(7) . ? 
C35 C36 1.413(7) . ? 
C36 C39 1.416(7) . ? 
C36 C37 1.419(7) . ? 
C37 C42 1.414(7) . ? 
C37 C38 1.438(6) . ? 
C38 C49 1.506(7) . ? 
C39 C40 1.372(8) . ? 
C40 C41 1.389(8) . ? 
C41 C42 1.381(7) . ? 
C43 C44 1.508(8) . ? 
C44 C49 1.375(8) . ? 
C44 C45 1.427(7) . ? 
C45 C46 1.364(8) . ? 
C46 C47 1.397(8) . ? 
C47 C50 1.397(8) . ? 
C47 C48 1.447(7) . ? 
C48 C53 1.414(8) . ? 
C48 C49 1.431(7) . ? 
C50 C51 1.366(8) . ? 
C51 C52 1.402(7) . ? 
C52 C53 1.355(8) . ? 
C54 C59 1.397(7) . ? 
C54 C55 1.403(7) . ? 
C55 C56 1.397(7) . ? 
C56 C57 1.372(8) . ? 
C57 C58 1.389(7) . ? 
C58 C59 1.406(7) . ? 
C59 C60 1.502(7) . ? 
C60 S2A 1.785(8) . ? 
C60 S2 1.883(7) . ? 
S2 C61 1.808(13) . ? 
C61 C62 1.478(19) . ? 
S2A C61A 1.821(14) . ? 
C61A C62A 1.524(18) . ? 
 
loop_ 
 _geom_angle_atom_site_label_1 
 _geom_angle_atom_site_label_2 
 _geom_angle_atom_site_label_3 
 _geom_angle 
 _geom_angle_site_symmetry_1 
 _geom_angle_site_symmetry_3 
 _geom_angle_publ_flag 
C23 Si1 C1 109.8(2) . . ? 
C23 Si1 C12 113.8(2) . . ? 
C1 Si1 C12 104.5(2) . . ? 
C2 C1 Si1 109.4(4) . . ? 
C32 Si2 C54 109.2(2) . . ? 
C32 Si2 C43 103.9(3) . . ? 
C54 Si2 C43 113.6(2) . . ? 
C7 C2 C3 119.8(5) . . ? 
C7 C2 C1 120.9(5) . . ? 
C3 C2 C1 119.3(5) . . ? 
C4 C3 C2 121.0(6) . . ? 
C3 C4 C5 120.2(6) . . ? 
C6 C5 C4 119.1(5) . . ? 
C6 C5 C8 119.5(7) . . ? 
C4 C5 C8 121.5(7) . . ? 
C5 C6 C7 120.2(5) . . ? 
C5 C6 C11 117.8(5) . . ? 
C7 C6 C11 122.0(6) . . ? 
C2 C7 C6 119.6(5) . . ? 
C2 C7 C18 120.2(5) . . ? 
C6 C7 C18 120.2(5) . . ? 
C9 C8 C5 120.2(8) . . ? 
C8 C9 C10 121.3(6) . . ? 
C11 C10 C9 119.0(7) . . ? 
C10 C11 C6 122.2(7) . . ? 
C13 C12 Si1 112.5(4) . . ? 
C18 C13 C14 119.8(5) . . ? 
C18 C13 C12 121.6(5) . . ? 
C14 C13 C12 118.6(6) . . ? 
C15 C14 C13 121.7(6) . . ? 
C14 C15 C16 120.3(6) . . ? 
C15 C16 C19 121.0(5) . . ? 
C15 C16 C17 119.4(5) . . ? 
C19 C16 C17 119.5(6) . . ? 
C22 C17 C16 118.2(5) . . ? 
C22 C17 C18 122.7(5) . . ? 
C16 C17 C18 119.1(6) . . ? 
C13 C18 C17 119.7(5) . . ? 
C13 C18 C7 121.3(5) . . ? 
C17 C18 C7 118.9(5) . . ? 
C20 C19 C16 119.9(6) . . ? 
C19 C20 C21 121.1(6) . . ? 
C22 C21 C20 119.8(6) . . ? 
C21 C22 C17 121.5(6) . . ? 
C24 C23 C28 117.9(5) . . ? 
C24 C23 Si1 116.9(4) . . ? 
C28 C23 Si1 125.1(4) . . ? 
C25 C24 C23 121.9(5) . . ? 
C26 C25 C24 119.6(6) . . ? 
C25 C26 C27 119.8(5) . . ? 
C28 C27 C26 121.2(6) . . ? 
C27 C28 C23 119.5(5) . . ? 
C27 C28 C29 118.0(5) . . ? 
C23 C28 C29 122.4(5) . . ? 
C28 C29 S1 113.6(5) . . ? 
C28 C29 S1A 115.3(5) . . ? 
S1 C29 S1A 13.7(5) . . ? 
C29 S1 C30 104.0(7) . . ? 
C31 C30 S1 113.6(11) . . ? 
C30A S1A C29 99.6(6) . . ? 
C31A C30A S1A 113.8(10) . . ? 
C33 C32 Si2 109.4(4) . . ? 
C38 C33 C34 119.4(4) . . ? 
C38 C33 C32 121.1(5) . . ? 
C34 C33 C32 119.5(5) . . ? 
C35 C34 C33 121.1(5) . . ? 
C34 C35 C36 120.6(5) . . ? 
C35 C36 C39 121.5(5) . . ? 
C35 C36 C37 119.1(4) . . ? 
C39 C36 C37 119.4(5) . . ? 
C42 C37 C36 118.5(4) . . ? 
C42 C37 C38 122.1(5) . . ? 
C36 C37 C38 119.5(5) . . ? 
C33 C38 C37 120.1(4) . . ? 
C33 C38 C49 120.0(4) . . ? 
C37 C38 C49 119.9(4) . . ? 
C40 C39 C36 120.3(5) . . ? 
C39 C40 C41 120.7(5) . . ? 
C42 C41 C40 120.3(6) . . ? 
C41 C42 C37 120.7(5) . . ? 
C44 C43 Si2 111.0(4) . . ? 
C49 C44 C45 119.5(5) . . ? 
C49 C44 C43 122.8(5) . . ? 
C45 C44 C43 117.7(6) . . ? 
C46 C45 C44 120.6(6) . . ? 
C45 C46 C47 121.9(5) . . ? 
C46 C47 C50 122.9(5) . . ? 
C46 C47 C48 118.4(5) . . ? 
C50 C47 C48 118.7(6) . . ? 
C53 C48 C49 123.4(5) . . ? 
C53 C48 C47 117.8(5) . . ? 
C49 C48 C47 118.8(5) . . ? 
C44 C49 C48 120.7(5) . . ? 
C44 C49 C38 120.0(5) . . ? 
C48 C49 C38 119.2(5) . . ? 
C51 C50 C47 121.7(5) . . ? 
C50 C51 C52 119.5(6) . . ? 
C53 C52 C51 121.2(6) . . ? 
C52 C53 C48 121.1(5) . . ? 
C59 C54 C55 118.7(5) . . ? 
C59 C54 Si2 123.9(4) . . ? 
C55 C54 Si2 117.4(4) . . ? 
C56 C55 C54 121.7(5) . . ? 
C57 C56 C55 118.9(5) . . ? 
C56 C57 C58 120.7(5) . . ? 
C57 C58 C59 120.7(5) . . ? 
C54 C59 C58 119.2(5) . . ? 
C54 C59 C60 122.9(5) . . ? 
C58 C59 C60 117.9(5) . . ? 
C59 C60 S2A 114.4(4) . . ? 
C59 C60 S2 114.3(4) . . ? 
S2A C60 S2 18.92(15) . . ? 
C61 S2 C60 98.8(5) . . ? 
C62 C61 S2 114.3(10) . . ? 
C60 S2A C61A 104.6(5) . . ? 
C62A C61A S2A 112.6(10) . . ? 
 
_diffrn_measured_fraction_theta_max    0.998 
_diffrn_reflns_theta_full              67.48 
_diffrn_measured_fraction_theta_full   0.998 
_refine_diff_density_max    0.344 
_refine_diff_density_min   -0.314 
_refine_diff_density_rms    0.058 
#===END
